# Supplementary material for: Assignment of photoelectron spectra of intramolecular silicon complexes: 1-vinyl- and 1-phenylsilatranes
Source: Royal Society of Chemistry journal article supplement (doi:10.1039/c8cp04582h), 2018-01-01
Supplement: c8cp04582h1.pdf [file c8cp04582h1.pdf]

## Electronic supplementary information

### Assignment of photoelectron spectra of intramolecular silicon complexes. 1-vinyl- and 1-phenylsilatranes

Elena F. Belogolova, Evgeniya P. Doronina, and Valery F. Sidorkin\*

*A. E. Favorsky Irkutsk Institute of Chemistry, Siberian Branch of the Russian Academy of Sciences  
Favorsky, 1, Irkutsk 664033, Russian Federation*

*E-mail: [svf@irioch.irk.ru](mailto:svf@irioch.irk.ru)*

**Table S1.** Selected CCSD/6-311G(d,p) geometrical parameters of the molecules XSi(OCH<sub>2</sub>CH<sub>2</sub>)<sub>3</sub>N.<sup>a</sup>

|          | X = Vinyl | X = Ph |
|----------|-----------|--------|
| Si-N     | 2.499     | 2.482  |
| Si-C     | 1.857     | 1.868  |
| Si-O     | 1.668     | 1.668  |
| O-C      | 1.409     | 1.409  |
| C-N      | 1.458     | 1.458  |
| XSiO     | 103.1     | 102.7  |
| OCC      | 109.5     | 109.5  |
| CNC      | 116.6     | 116.4  |
| CNSi     | 100.8     | 101.0  |
| $\eta_e$ | 53        | 55     |

<sup>a</sup> Bond lengths are in angstroms, angles are in degrees. The geometric parameters are averaged for three chains.

**Table S2.** Mulliken Populations in the Selected MOs of Vinyl-Silatrane<sup>a</sup>

| Atom               | 54a  | 53a  | 52a  | 51a  | 50a  | 49a  | 48a  | 47a  | 46a  |
|--------------------|------|------|------|------|------|------|------|------|------|
| N                  | 1.03 | 0.00 | 0.21 | 0.04 | 0.04 | 0.02 | 0.01 | 0.01 | 0.06 |
| Si                 | 0.06 | 0.03 | 0.20 | 0.06 | 0.07 | 0.12 | 0.09 | 0.09 | 0.10 |
| O                  | 0.05 | 0.01 | 0.18 | 0.33 | 0.32 | 0.29 | 0.31 | 0.30 | 0.34 |
| C <sub>α</sub>     | 0.07 | 0.00 | 0.01 | 0.09 | 0.10 | 0.02 | 0.06 | 0.05 | 0.07 |
| C <sub>β</sub>     | 0.06 | 0.00 | 0.02 | 0.10 | 0.10 | 0.05 | 0.12 | 0.12 | 0.10 |
| C <sup>1</sup> (X) | 0.07 | 0.94 | 0.46 | 0.01 | 0.02 | 0.20 | 0.01 | 0.02 | 0.04 |
| C <sup>2</sup> (X) | 0.01 | 0.96 | 0.11 | 0.00 | 0.01 | 0.11 | 0.00 | 0.00 | 0.04 |

<sup>a</sup> HF calculations using the 6-311G(d,p) basis for the CCSD/6-311G(d,p) molecular geometry.

Units are electrons; the sum over all atoms is 2.

**Table S3.** Mulliken Populations in the Selected MOs of Phenyl-Silatrane<sup>a</sup>

| Atom               | 67a  | 66a  | 65a  | 64a  | 63a  | 62a  | 61a  | 60a  | 59a  | 58a  | 57a  |
|--------------------|------|------|------|------|------|------|------|------|------|------|------|
| N                  | 0.00 | 0.00 | 1.00 | 0.22 | 0.03 | 0.04 | 0.02 | 0.00 | 0.01 | 0.01 | 0.00 |
| Si                 | 0.02 | 0.00 | 0.07 | 0.21 | 0.06 | 0.06 | 0.10 | 0.02 | 0.09 | 0.07 | 0.02 |
| O                  | 0.01 | 0.00 | 0.05 | 0.15 | 0.32 | 0.33 | 0.31 | 0.07 | 0.29 | 0.20 | 0.05 |
| C <sub>α</sub>     | 0.00 | 0.00 | 0.07 | 0.01 | 0.09 | 0.09 | 0.02 | 0.01 | 0.06 | 0.03 | 0.02 |
| C <sub>β</sub>     | 0.00 | 0.00 | 0.06 | 0.02 | 0.09 | 0.10 | 0.05 | 0.02 | 0.11 | 0.08 | 0.03 |
| C <sup>1</sup> (X) | 0.66 | 0.01 | 0.08 | 0.43 | 0.00 | 0.00 | 0.12 | 0.21 | 0.01 | 0.08 | 0.26 |
| C <sup>2</sup> (X) | 0.15 | 0.50 | 0.01 | 0.09 | 0.01 | 0.01 | 0.06 | 0.24 | 0.01 | 0.06 | 0.26 |
| C <sup>3</sup> (X) | 0.18 | 0.48 | 0.01 | 0.08 | 0.02 | 0.00 | 0.06 | 0.17 | 0.01 | 0.08 | 0.28 |
| C <sup>4</sup> (X) | 0.61 | 0.01 | 0.00 | 0.03 | 0.02 | 0.00 | 0.04 | 0.17 | 0.01 | 0.09 | 0.28 |
| C <sup>5</sup> (X) | 0.13 | 0.53 | 0.01 | 0.08 | 0.02 | 0.00 | 0.06 | 0.15 | 0.01 | 0.09 | 0.28 |
| C <sup>6</sup> (X) | 0.21 | 0.45 | 0.01 | 0.10 | 0.01 | 0.01 | 0.07 | 0.20 | 0.01 | 0.10 | 0.25 |

<sup>a</sup> HF calculations using the 6-311G(d,p) basis for the CCSD/6-311G(d,p) molecular geometry.

Units are electrons; the sum over all atoms is 2.

**Table S4.** HF/6-311G(d,p)//CCSD/6-311G(d,p) orbital coefficients in MO's  $HV_1$  and  $HV_2$  for the 3c-4e XSi←N moiety of molecules XSi(OCH<sub>2</sub>CH<sub>2</sub>)<sub>3</sub>N.<sup>a</sup>

|                |                       | X = Vinyl | X = Ph | X = Vinyl | X = Ph | X = Vinyl | X = Ph |
|----------------|-----------------------|-----------|--------|-----------|--------|-----------|--------|
| N              | <i>s</i>              | 0.18      | 0.18   | 0.10      | 0.11   | -0.07     | -0.08  |
|                | <i>p<sub>z</sub></i>  | 0.44      | 0.43   | 0.18      | 0.19   | -0.06     | -0.07  |
| Si             | <i>s</i>              | 0.07      | 0.06   | -0.11     | -0.12  | -0.10     | -0.09  |
|                | <i>p<sub>z</sub></i>  | -0.06     | -0.05  | -0.14     | -0.14  | -0.11     | -0.10  |
|                | <i>d<sub>zz</sub></i> | 0.06      | 0.06   | -0.06     | -0.06  | -0.03     | -0.03  |
| C              | <i>s</i>              | 0.08      | 0.06   | -0.14     | -0.13  | -0.04     | -0.02  |
|                | <i>p<sub>z</sub></i>  | -0.09     | -0.13  | 0.21      | 0.21   | 0.13      | 0.11   |
| O <sup>1</sup> | <i>s</i>              | -0.03     | -0.04  | 0.03      | 0.04   | 0.02      | 0.04   |
|                | <i>p<sub>x</sub></i>  | 0.07      | 0.03   | -0.04     | -0.11  | -0.04     | 0.17   |
|                | <i>p<sub>y</sub></i>  | -0.06     | -0.09  | 0.10      | 0.08   | -0.18     | -0.11  |
|                | <i>p<sub>z</sub></i>  | -0.02     | -0.03  | 0.06      | 0.09   | -0.05     | -0.00  |
| O <sup>2</sup> | <i>s</i>              | -0.04     | -0.03  | 0.04      | 0.03   | 0.02      | 0.02   |
|                | <i>p<sub>x</sub></i>  | 0.02      | -0.09  | -0.11     | 0.12   | -0.04     | -0.15  |
|                | <i>p<sub>y</sub></i>  | 0.09      | 0.03   | -0.08     | 0.05   | -0.18     | -0.12  |
|                | <i>p<sub>z</sub></i>  | -0.02     | -0.02  | 0.09      | 0.08   | -0.05     | -0.04  |
| O <sup>3</sup> | <i>s</i>              | -0.03     | -0.04  | 0.03      | 0.04   | 0.05      | 0.03   |
|                | <i>p<sub>x</sub></i>  | -0.09     | 0.07   | 0.13      | -0.02  | 0.20      | -0.02  |
|                | <i>p<sub>y</sub></i>  | -0.02     | 0.06   | -0.07     | -0.10  | 0.11      | 0.21   |
|                | <i>p<sub>z</sub></i>  | -0.03     | -0.02  | 0.10      | 0.06   | -0.03     | -0.05  |

<sup>a</sup> The Z axis is directed along the Si←N bond from N to Si.

**Table S5.** Experimental and OVGf calculated (with Pople's and Dunning's basis sets) vertical ionization energies (eV) for the molecule of 1-vinylsilatrane (**5**).

| <i>Exp.</i> <sup>a</sup> | MO             |                   | OVGF               |                      |                    |
|--------------------------|----------------|-------------------|--------------------|----------------------|--------------------|
|                          |                |                   | 6-311G(d,p)        | cc-pVTZ              | aug-cc-pVTZ        |
| 8.5                      | 54a            | $HV_2$            | 8.90               | 8.94                 | 9.02               |
| 9.3                      | 53a            | $\pi_{CC}$        | 9.31               | 9.48                 | 9.56               |
| 9.6                      | 52a            | $HV_1$            | 10.13              | 10.27                | 10.37              |
| 10.2                     | 51a }<br>50a } | $e(n_O)$          | 10.47 }<br>10.52 } | 10.60 }<br>10.65 }   | 10.70 }<br>10.75 } |
|                          | 10.9           |                   | 49a                | $n_O + \sigma_{SiC}$ | 10.85              |
| 11.8                     | 48a }<br>47a } | $e(\sigma_{SiO})$ | 11.31 }<br>11.34 } | 11.42 }<br>11.45 }   | 11.52 }<br>11.54 } |
|                          | <i>MAE</i>     |                   | 0.32               | 0.37                 | 0.42               |

<sup>a</sup> J. B. Peel and D. Wang, *J. Chem. Soc., Dalton Trans.* 1988, 1963–1967.

**Table S6.** Experimental and OVGf calculated (with Pople's and Dunning's basis sets) vertical ionization energies (eV) for the molecule of 1-phenylsilatrane (**6**).

| <i>Exp.</i> <sup>a</sup> | MO             |                    | OVGF                        |                    |
|--------------------------|----------------|--------------------|-----------------------------|--------------------|
|                          |                |                    | 6-311G(d,p)                 | cc-pVTZ            |
| 8.8                      | 67a }<br>66a } | $e_{lg}(\pi_{Ph})$ | 8.29 }<br>8.33 }            | 8.47 }<br>8.51 }   |
|                          | 65a            |                    | $HV_2$                      | 8.96               |
|                          | 9.9            | 64a                | $HV_1$                      | 9.93               |
| 10.4                     | 63a }<br>62a } | $e(n_O)$           | 10.49 }<br>10.50 }          | 10.62 }<br>10.63 } |
|                          | 61a            |                    | $n_O + \sigma_{SiC}$        | 10.66              |
|                          | 11.2           | 60a }<br>59a }     | $\sigma_{Ph} + \sigma_{CH}$ | 11.18 }<br>11.34 } |
| 58a }                    |                | $e(\sigma_{SiO})$  |                             | 11.42 }            |
| <i>MAE</i>               |                | 0.20               | 0.23                        |                    |

<sup>a</sup> J. B. Peel and D. Wang, *J. Chem. Soc., Dalton Trans.* 1988, 1963–1967.

**Table S7.** OVGF/6-311G(d,p) linear vibronic coupling constants,  $k \times 10$  (eV), for nine ionization transitions of 1-vinylsilatrane evaluated with respect to the totally symmetric normal modes,  $\nu_n$ , frequencies,  $\omega$  ( $\text{cm}^{-1}$ ), and the corresponding vibrational widths,  $\Delta$  (eV).<sup>a</sup>

| $\nu_n$  | $\omega$ | 54a    | 53a        | 52a    | 51a   | 50a   | 49a                  | 48a   | 47a   | 46a   |
|----------|----------|--------|------------|--------|-------|-------|----------------------|-------|-------|-------|
|          |          | $HV_2$ | $\pi_{CC}$ | $HV_1$ | $n_O$ | $n_O$ | $n_O + \sigma_{SiC}$ | $n_O$ | $n_O$ | $n_O$ |
| 1        | 70       | 0.11   | -0.05      | 0.01   | 0.00  | 0.00  | -0.10                | 0.00  | -0.01 | -0.03 |
| 2        | 82       | -0.12  | 0.06       | 0.00   | -0.01 | 0.00  | 0.10                 | 0.00  | 0.00  | 0.04  |
| 6        | 192      | -0.15  | 0.06       | 0.02   | 0.01  | -0.01 | 0.04                 | 0.01  | 0.00  | 0.02  |
| 7        | 194      | 0.10   | -0.04      | -0.02  | 0.02  | 0.00  | -0.02                | 0.01  | -0.01 | -0.01 |
| 11       | 328      | -0.05  | 0.02       | 0.01   | -0.02 | 0.01  | 0.02                 | 0.01  | -0.02 | 0.00  |
| 13       | 384      | -0.05  | 0.02       | 0.00   | 0.03  | -0.01 | -0.01                | 0.00  | 0.02  | 0.00  |
| 16       | 462      | -0.05  | -0.04      | 0.01   | 0.02  | 0.03  | -0.02                | 0.02  | 0.01  | 0.03  |
| 18       | 564      | -0.05  | 0.02       | -0.03  | -0.02 | -0.02 | 0.04                 | -0.02 | -0.02 | -0.07 |
| 22       | 727      | 0.06   | -0.12      | -0.03  | 0.03  | 0.03  | -0.09                | 0.03  | 0.03  | 0.02  |
| 23       | 769      | 0.03   | -0.06      | 0.02   | 0.05  | 0.05  | -0.04                | 0.05  | 0.04  | 0.06  |
| 25       | 792      | 0.01   | -0.02      | -0.02  | 0.06  | -0.02 | -0.02                | 0.01  | 0.02  | 0.02  |
| 28       | 903      | 0.07   | -0.04      | -0.02  | 0.01  | 0.00  | -0.04                | 0.03  | 0.03  | 0.00  |
| 32       | 1016     | 0.08   | 0.00       | -0.01  | 0.02  | 0.01  | 0.00                 | 0.00  | 0.00  | 0.01  |
| 37       | 1092     | -0.07  | 0.00       | -0.02  | -0.02 | -0.02 | 0.03                 | 0.00  | 0.00  | -0.04 |
| 39       | 1150     | 0.00   | 0.01       | 0.00   | 0.05  | -0.05 | 0.01                 | -0.01 | 0.00  | 0.00  |
| 40       | 1175     | 0.00   | 0.09       | 0.04   | -0.07 | -0.06 | 0.07                 | -0.07 | -0.07 | -0.03 |
| 46       | 1288     | 0.04   | -0.01      | 0.02   | -0.02 | -0.02 | 0.00                 | 0.00  | -0.01 | -0.07 |
| 47       | 1294     | 0.01   | 0.05       | 0.08   | 0.01  | 0.00  | 0.11                 | 0.00  | 0.01  | 0.00  |
| 52       | 1387     | 0.05   | -0.01      | 0.01   | -0.04 | -0.04 | -0.01                | -0.01 | -0.01 | -0.02 |
| 53       | 1395     | -0.03  | 0.03       | 0.05   | 0.00  | 0.00  | 0.06                 | 0.05  | 0.05  | 0.02  |
| 56       | 1434     | 0.00   | -0.04      | 0.03   | -0.01 | -0.01 | 0.05                 | -0.01 | -0.01 | -0.01 |
| 59       | 1485     | 0.06   | -0.01      | 0.00   | -0.02 | -0.02 | -0.02                | 0.01  | 0.01  | 0.01  |
| 63       | 1670     | 0.00   | -0.17      | 0.02   | 0.00  | -0.01 | 0.15                 | 0.00  | 0.00  | -0.01 |
| 77       | 3129     | -0.01  | -0.02      | -0.03  | 0.00  | -0.01 | 0.10                 | 0.00  | -0.01 | 0.01  |
| $\Delta$ |          | 0.74   | 0.65       | 0.31   | 0.42  | 0.40  | 0.76                 | 0.37  | 0.35  | 0.36  |

<sup>a</sup> Only modes with  $|k| > 0.04$  are given.

**Table S8.** OVGF/6-311G(d,p) linear vibronic coupling constants,  $k \times 10$  (eV), for nine ionization transitions of 1-phenylsilatrane evaluated with respect to the totally symmetric normal modes,  $\nu_n$ , frequencies,  $\omega$  ( $\text{cm}^{-1}$ ), and the corresponding vibrational widths,  $\Delta$  (eV).<sup>a</sup>

| $\nu_n$  | $\omega$ | 67a               | 66a               | 65a    | 64a    | 63a            | 62a            | 61a                                  | 60a                  | 59a            |
|----------|----------|-------------------|-------------------|--------|--------|----------------|----------------|--------------------------------------|----------------------|----------------|
|          |          | $\pi_{\text{Ph}}$ | $\pi_{\text{Ph}}$ | $HV_2$ | $HV_1$ | $n_{\text{O}}$ | $n_{\text{O}}$ | $n_{\text{O}} + \sigma_{\text{SiC}}$ | $\sigma_{\text{Ph}}$ | $n_{\text{O}}$ |
| 3        | 74       | -0.06             | -0.05             | 0.15   | 0.02   | 0.01           | 0.01           | -0.11                                | -0.03                | -0.05          |
| 7        | 169      | -0.07             | -0.01             | 0.12   | -0.03  | 0.01           | 0.01           | 0.00                                 | -0.03                | -0.03          |
| 11       | 281      | -0.01             | -0.02             | 0.05   | -0.01  | -0.01          | -0.01          | -0.04                                | -0.02                | -0.02          |
| 13       | 334      | -0.01             | -0.07             | 0.13   | 0.00   | 0.01           | 0.01           | 0.01                                 | -0.05                | -0.05          |
| 20       | 497      | 0.01              | 0.07              | 0.02   | 0.01   | -0.03          | -0.03          | -0.02                                | 0.04                 | 0.04           |
| 21       | 575      | -0.01             | -0.06             | 0.06   | 0.02   | 0.02           | 0.02           | -0.02                                | -0.03                | -0.04          |
| 24       | 618      | 0.01              | 0.07              | -0.03  | 0.00   | -0.04          | -0.04          | -0.01                                | 0.04                 | 0.03           |
| 27       | 724      | 0.09              | 0.02              | -0.03  | 0.06   | -0.02          | -0.02          | 0.04                                 | -0.01                | 0.07           |
| 29       | 765      | 0.06              | -0.01             | -0.02  | 0.01   | -0.04          | -0.05          | -0.01                                | -0.01                | 0.03           |
| 35       | 904      | 0.04              | 0.02              | -0.07  | 0.03   | -0.01          | -0.01          | 0.02                                 | 0.01                 | 0.03           |
| 41       | 1015     | -0.04             | -0.04             | -0.01  | -0.05  | -0.01          | 0.00           | -0.02                                | 0.02                 | -0.09          |
| 42       | 1017     | 0.00              | -0.01             | 0.07   | -0.01  | 0.02           | 0.02           | -0.01                                | 0.00                 | -0.01          |
| 43       | 1054     | 0.00              | -0.05             | 0.00   | 0.03   | 0.00           | 0.00           | 0.01                                 | -0.01                | -0.09          |
| 46       | 1092     | 0.00              | 0.00              | 0.06   | 0.02   | 0.02           | 0.02           | -0.03                                | 0.00                 | 0.00           |
| 48       | 1145     | -0.03             | 0.04              | 0.01   | -0.08  | 0.01           | 0.03           | -0.04                                | 0.00                 | 0.04           |
| 51       | 1174     | 0.07              | 0.06              | 0.00   | 0.07   | -0.06          | -0.07          | 0.03                                 | 0.03                 | 0.07           |
| 55       | 1207     | 0.03              | -0.03             | 0.01   | 0.03   | 0.00           | 0.01           | 0.02                                 | -0.05                | 0.00           |
| 66       | 1387     | -0.01             | 0.00              | 0.05   | 0.01   | -0.04          | -0.04          | -0.01                                | -0.01                | 0.00           |
| 67       | 1395     | 0.02              | 0.02              | -0.03  | 0.03   | 0.00           | 0.00           | 0.05                                 | 0.03                 | 0.02           |
| 73       | 1486     | 0.01              | 0.00              | -0.06  | -0.01  | 0.02           | 0.02           | 0.01                                 | 0.00                 | 0.01           |
| 79       | 1649     | 0.03              | -0.04             | -0.01  | -0.09  | 0.00           | 0.00           | -0.09                                | 0.17                 | 0.00           |
| 94       | 3181     | 0.00              | 0.00              | 0.00   | 0.01   | 0.00           | -0.01          | 0.01                                 | -0.06                | 0.00           |
| 96       | 3195     | 0.02              | 0.01              | 0.00   | 0.00   | 0.01           | 0.00           | -0.01                                | -0.07                | 0.04           |
| $\Delta$ |          | 0.44              | 0.47              | 0.70   | 0.42   | 0.30           | 0.33           | 0.46                                 | 0.54                 | 0.49           |

<sup>a</sup> Only modes with  $|k| > 0.04$  are given.
